# Supplementary material for: The AfaR small RNA controls expression of the AfaD-VIII invasin in pathogenic Escherichia coli strains
Source: PubMed Central journal article supplement — Nucleic Acids Res. 2013 Apr 5;41(10):5469–82. doi: 10.1093/nar/gkt208 (PMC3664800; doi:10.1093/nar/gkt208), 2013-04-05

## Supplementary Information

### **The AfaR small RNA controls expression of the AfaD-VIII invasin in pathogenic *Escherichia coli* strains**

Christophe Pichon<sup>1,2</sup>, Laurence du Merle<sup>1,2</sup>, Isabelle Lequeutre<sup>3</sup>, and Chantal Le Bouguéne<sup>1,2,\*</sup>.

<sup>1</sup>Institut Pasteur, Unité de Biologie des Bactéries Pathogènes à Gram Positif, 25-28 Rue du Docteur Roux, F-75724 Paris, France.

<sup>2</sup>CNRS, ERL3526 Microbiologie fonctionnelle et moléculaire, F-75724 Paris, France.

<sup>3</sup>Institut Pasteur, Centre d'Enseignement, 25-28 Rue du Docteur Roux, F-75724 Paris, France.

Running title: Control of AfaD invasin expression.

\* Corresponding author: Institut Pasteur, Unité de Biologie des Bactéries Pathogènes à Gram Positif, Département de Microbiologie, 25-28 Rue du Docteur Roux, F-75724 Paris, France.  
Tel.: +33 1 40 61 32 80; Fax.: +33 1 40 61 36 40; E-mail: [clb@pasteur.fr](mailto:clb@pasteur.fr)

## Supplementary Tables & Figures

Supplementary Figure S1: Relative levels of expression of the *afaABCDEF* genes from eight *afa-8*-carrying *E. coli* strains analyzed by qRT-PCR. The AL10, AL213, AL511, 239KH89, 183, BW25113 + pILL1320, BW25113 + pILL1322 and BW25113 + pILL1323 strains were grown to an OD<sub>600</sub> of 0.6 in LB medium. We set *afaA* expression levels to 1 and the expression levels of other genes are expressed relative to *afaA*.

Supplementary Figure S2: Results from circular RACE experiments on the *afaC* mRNA. (A) Position of ribonuclease cleavages (gray arrow) in the *afaB/afaC* intergenic region. (B) Position of ribonuclease cleavages (gray arrow) in the *afaC/afaD* intergenic region. The “Met” tag and asterisks indicate the start and stop codons of the CDS, respectively.

Supplementary Figure S3: RNase III/LS/G/P dependence in the regulation of *afaA*, *afaC* and *afaD* mRNAs and AfaR sRNA. (A) Relative expression of the *afaA*, *afaC*, *afaD* mRNAs and AfaR was determined by qRT-PCR in RNase-depleted strains with respect to the corresponding wild-type strains, both carrying the pILL1320 plasmid. A minimal two-fold change in the relative level indicated a significant implication of the tested RNase (symbolized by dashed lines). (B) Model of the posttranscriptional regulation of the *afa-8* gene cluster by RNases and AfaR sRNA. The open arrows indicate the position of cleavage sites.

Supplementary Table 1:

| Amplification                    | Name                                 | Primer sequence                                                              |
|----------------------------------|--------------------------------------|------------------------------------------------------------------------------|
| <b>Allelic exchange</b>          |                                      |                                                                              |
| <i>afaR</i> :: <i>KmFRT</i>      | afaR.FRT.5                           | 5'-CATCAAAAAGTGGACGTCTGTTATGGAAACATATGTAGCTAGTGTAGGCTG<br>GAGCTGCTTC-3'      |
|                                  | afaR.FRT.3                           | 5'-GTGATATTTTAAATGTACAGTCAACTACAACAGTAGCTGCCCATATGAATA<br>TCCTCCTTA-3'       |
| <i>afaRE</i> :: <i>KmFRT</i>     | afaRE.FRT.3                          | 5'-GCCCCCTTCTTTTCATCAGGTTAATTTCCATCAGTCGGTCCATATGAATAT<br>CCTCCTTA-3'        |
|                                  | afaD.FRT.5                           | 5'-TCTGGTGCGCACTGTGTGTATGTGACCAAGGAGTACCCTGGTGTAGGCTG<br>GAGCTGCTTC-3'       |
| <i>afaD</i> :: <i>KmFRT</i>      | afaD.FRT.3                           | 5'-ACTGAATAGTTACTTTATTAGCATAAAGAAATTATGAATACATATGAATA<br>TCCTCCTTA-3'        |
|                                  | afaPrA.FRT.5                         | 5'-ACGGAGTTTTCAGCTCCGTTAGGAACGTCAGTATATTGTCTTTCATGTGTA<br>GGCTGGAGCTGCTTC-3' |
| <i>afaFA</i> :: <i>KmFRT</i>     | afaPrA.FRT.3                         | 5'-TAACCCCGTTACTCTGACAGGGAAACAACTCTCAGCATCATATGAATA<br>TCCTCCTTA-3'          |
|                                  | <b>Allelic exchange verification</b> |                                                                              |
| <i>afaR</i> :: <i>KmFRT</i>      | afaR.verif5                          | 5'-TTGGTGATGCAGTGTCCACC-3'                                                   |
|                                  | afaR.verif3                          | 5'-TCTATAATACTGCTTCACCAC-3'                                                  |
| <i>afaD</i> :: <i>KmFRT</i>      | afaD.verif5                          | 5'-GAGCGGACTGGATGAAACCG-3'                                                   |
|                                  | afaD.verif3                          | 5'-GCTATTTTAGAGGGCAGCCA-3'                                                   |
| <i>afaFA</i> :: <i>KmFRT</i>     | afaPrA.verif5                        | 5'-CATCAGGTAATATCTGGCCT-3'                                                   |
|                                  | afaPrA.verif3                        | 5'-CACTTCTCACTGTGCATCC-3'                                                    |
| <b>Cloning</b>                   |                                      |                                                                              |
| <i>afa8</i>                      | clon.afa8.5                          | 5'-CCC <u>GGGAAGCTT</u> AATGGCATGGTTCATCGTCT-3'                              |
|                                  | clon.afa8.3                          | 5'-CCC <u>GGGAAGCTT</u> GCCAGGCTGATTTAAACACAA-3'                             |
| <i>afaR</i>                      | Cl.afaR.EcoRI                        | 5'-TTTTT <u>TGAATT</u> CTAGCTACATATGTTCCATAACAGAC-3'                         |
|                                  | Cl.afaR.XbaI                         | 5'-TTTTT <u>TCTAGAC</u> AGTCTGGCGCAGGCAGTTG-3'                               |
| <i>afaD</i> :: <i>gfp</i>        | afaC.NsiI                            | 5'-GTTTTTATGCATAAATTATCGACTTCCAGAGGAG-3'                                     |
|                                  | afaD.NheI                            | 5'-GTTTTT <u>GCTAGCC</u> GCCAGACTGGATATAACCAC-3'                             |
| <i>lacZ</i> :: <i>afaD</i>       | afaD.NsiI                            | 5'-TGCATGGAAATCAGCTGCTTGGGCTGATG-3'                                          |
|                                  | afaD.XbaI                            | 5'-GTTTTT <u>TCTAGAC</u> CATAACAGACGTCCACTTT-3'                              |
| <i>afaR</i> *                    | mutafaR5                             | 5'-CTTACATTgtATATGCATTTAAC-3'                                                |
|                                  | mutafaR3                             | 5'-GTTAAATGCATATacAATGTAAG-3'                                                |
| <i>afaD</i> *:: <i>gfp</i>       | mutafaCD5                            | 5'-TGGTCAGtTACACACAGTGC-3'                                                   |
|                                  | mutafaCD3                            | 5'-GCACTGTGTGTAAcTGACCA-3'                                                   |
| <i>afaA</i> :: <i>lacZ</i>       | pQFafaA.XbaI                         | 5'-CCC <u>GGGTCTAGAC</u> AGCGCCGAATGAACACC-3'                                |
|                                  | pQFafaA.XhoI                         | 5'-CCC <u>GGGCTCGAGT</u> TTTTGATTAATGTCCAGAAAATAAGA-3'                       |
| <i>afaB</i> :: <i>lacZ</i>       | pQFafaB.XbaI                         | 5'-CCC <u>GGGTCTAGAT</u> ATTTTTATCCTGAAGGCAAA-3'                             |
|                                  | pQFafaB.XhoI                         | 5'-CCC <u>GGGCTCGAGT</u> CAGGGAGCATCTTGTTATGG-3'                             |
| <i>afaC</i> :: <i>lacZ</i>       | pQFafaC.XbaI                         | 5'-CCC <u>GGGTCTAGAT</u> ATTCACACCTGAGCCACGG-3'                              |
|                                  | pQFafaC.XhoI                         | 5'-CCC <u>GGGCTCGAGT</u> GGTGCATCAGGAAAAGTCA-3'                              |
| <i>afaD</i> :: <i>lacZ</i>       | pQFafaD.XbaI                         | 5'-CCC <u>GGGTCTAGAC</u> AGGGTACTCCTTGGTCACA-3'                              |
|                                  | pQFafaD.XhoI                         | 5'-CCC <u>GGGCTCGAG</u> ACTCGAGTAGGGGAAGAGC-3'                               |
| <i>afaE</i> :: <i>lacZ</i>       | pQFafaE.XbaI                         | 5'-CCC <u>GGGTCTAGAAC</u> CTTATCCTTATACTTGGT-3'                              |
|                                  | pQFafaE.XhoI                         | 5'-CCC <u>GGGCTCGAG</u> CAGTGTCCACCTTTTCATCA-3'                              |
| <i>afaR</i> :: <i>lacZ</i>       | pQFafaR0.XbaI                        | 5'-TTTAAACTCGAGTTTTAAATGCTTCCACCAGTG-3'                                      |
|                                  | pQFafaR0.XhoI                        | 5'-CCC <u>GGGTCTAGAA</u> ATGTAAGTGAACCTGAGTGCCG-3'                           |
| <b>Cloning verification</b>      |                                      |                                                                              |
| <i>afaR</i>                      | verif.pZE2R.5                        | 5'-AATAGGCGTATCACGAGGCC-3'                                                   |
|                                  | verif.pZE2R.3                        | 5'-GTCGACCTGCAGCTAGGTCT-3'                                                   |
| <i>afaD fusion</i>               | pZE-CAT                              | 5'-TGGGATATATCAACGGTGGT-3'                                                   |
|                                  | JV0155                               | 5'-CCGTATGTAGCATCACCTTC-3'                                                   |
| <i>afa</i> :: <i>lacZ fusion</i> | pQF50.5                              | 5'-CGACTCCTGCATTAGGAAGC-3'                                                   |
|                                  | pQF50.3                              | 5'-GTTTTCCAGTCACGACGTT-3'                                                    |
| <b>Quantitative RT-PCR</b>       |                                      |                                                                              |
| 5S                               | 5S.Fw                                | 5'-GGTGGTCCCACCTGACC-3'                                                      |
|                                  | 5S.RT                                | 5'-ATGCCTGGCAGTTCCCTACT-3'                                                   |
| <i>afaA</i>                      | afaA.Fw                              | 5'-CCGGGATGCACAGTGAGAAA-3'                                                   |
|                                  | afaA.RT                              | 5'-AACACCGTGTGCTCACAGG-3'                                                    |
| <i>afaB</i>                      | afaB.Fw                              | 5'-GAGCCGTTTGCGAATTGTCC-3'                                                   |
|                                  | afaB.RT                              | 5'-CATCATGCTTTGGCGGAATG-3'                                                   |
| <i>afaC</i>                      | afaC.Fw                              | 5'-CTGCTGAAGTGGCAGGCAAA-3'                                                   |
|                                  | afaC.RT                              | 5'-ATGCCCGGCTCAAGAGTGAC-3'                                                   |
| <i>afaD</i>                      | afaD.Fw                              | 5'-CAGTCTGGCGCAGGCAGTT-3'                                                    |
|                                  | afaD.RT                              | 5'-CCTTCCTGTTGCCACCTTCG-3'                                                   |
| <i>afaE</i>                      | afaE.Fw                              | 5'-AGACTTCGCCAGGACCGTTG-3'                                                   |
|                                  | afaE.RT                              | 5'-ATCGGTGCGCCGTATGAACT-3'                                                   |
| <i>afaF</i>                      | afaF.Fw                              | 5'-CCGTGCCGACAACAGAAAT-3'                                                    |
|                                  | afaF.RT                              | 5'-CCGGCGAGCGTTTTATCTTTC-3'                                                  |
| <i>afaR</i>                      | afaR.Fw                              | 5'-ATGTTCCATAACAGACGTCCAC-3'                                                 |

|                     |             |                                       |
|---------------------|-------------|---------------------------------------|
| <i>lacZ</i>         | afaR.RT     | 5'-AATGTAAGTGTAAACTGAGTGCCGTA-3'      |
|                     | lacZ.Fw     | 5'-CGTTTTACAACGTCGTGACTG-3'           |
|                     | lacZ.RT     | 5'-GGCCTCTTCGCTATTACGC-3'             |
| <i>gfp</i>          | gfp.Fw      | 5'-TACAAGACGCGTGCTGAAAGT-3'           |
|                     | gfp.RT      | 5'-TGTGTCCGAGAATGTTTCA-3'             |
| <b>5' RACE</b>      |             |                                       |
| AfaR sRNA           | pri.afaR.RT | 5'-GCCATTAACCTTGATTGGTGATGCAGTGTCC-3' |
| 5' <i>afaC</i> mRNA | rigBC.RT    | 5'-GTGCATTATTACACCTGAGC-3'            |
| 3' <i>afaC</i> mRNA | rigCD.Fw    | 5'-GAGGAGAAAGAAGCAACTGGT-3'           |
| <i>afaD</i> mRNA    | pri.afaD.RT | 5'-CCTTCCTGTTGCCACCTTCG-3'            |

Supplementary Table S2: Additional strains.

| Name                          | Description / Relevant characteristics            | Phenotypes             | Source / Reference |
|-------------------------------|---------------------------------------------------|------------------------|--------------------|
| <b><i>E. coli</i> strains</b> |                                                   |                        |                    |
| A19                           | <i>rna-19, gdhA2, his-95, relA1, spoT1, metB1</i> |                        | CGSC# 5997         |
| AB301-105                     | A19 <i>rnc-105</i>                                | RNase III <sup>-</sup> | CGSC# 5400         |
| GW10                          | W3110 <i>zce-726::Tn10</i>                        |                        | 64                 |
| GW11                          | GW10 <i>cafA::cat</i>                             | RNase G <sup>-</sup>   | 64                 |
| MH1                           | <i>sup0, hsdR, ΔlacX74, rpsL</i>                  |                        | 65                 |
| TY0324                        | <i>MH1 ΔrnlA::km</i>                              | RNase LS <sup>-</sup>  | 65                 |
| ts709                         | <i>rnpB-709<sup>ts</sup></i>                      | RNase P <sup>ts</sup>  | 66                 |

CGSC: Coli Genetic Stock Center.

## Supplementary results

### *The afaABCD mRNA is cleaved by multiple RNases*

Characterization of the transcriptional units of the *afa-8* gene cluster led us to suggest that RNases might regulate the level of *afaABCD* mRNA posttranscriptionally. We tested this hypothesis, by analyzing the dependence of four *E. coli* RNases (RNase III/P/G and LS) on the expression of the *afa-8* gene cluster. The pILL1320 plasmid was introduced into *E. coli*  $\Delta rnc-105$  (RNase III<sup>-</sup>),  $\Delta rnlA$  (RNaseLS<sup>-</sup>) and  $\Delta cafA$  (RNase G<sup>-</sup>) strains, and an *E. coli* strain carrying the thermosensitive allele *rnpB-709* (RNase P<sup>ts</sup>) and their corresponding wild-type (WT) counterparts. The WT,  $\Delta rnc-105$ ,  $\Delta rnlA$  and  $\Delta cafA$  strains were grown to an OD<sub>600</sub> of 0.6 at 37°C. In the case of the thermosensitive *rnpB-709* mutant, samples were obtained as described for RNase E strains. The levels of *afaA*, *afaC*, *afaD* mRNAs and of the AfaR sRNA were determined by qRT-PCR in these strains and are expressed relative to the WT values. No significant differences in *afaA* transcription were observed between the tested mutants, suggesting that RNases had no effect on transcription (Supplementary Figure S3A). However, a significant increase in the level of transcription of *afaC* and *afaD* and *afaR* was observed when RNase III was inactivated. Interestingly, the *afaD* mRNA and the AfaR sRNA were less abundant in an RNase LS-depleted strain. Our findings do not rule out the

possibility of a significant effect of RNases G and P. The results presented in the text suggest that the RNA was cleaved around *afaC*, by an unknown RNase. We hypothesized that RNase III might be involved in *afaABCD* mRNA processing. A putative model of regulation by RNase E/III and AfaR sRNA is shown in Supplementary Figure S3B.

## Supplementary References

64. Wachi, M., Umitsuki, G., Shimizu, M., Takada, A. and Nagai, K. (1999) *Escherichia coli cafA* gene encodes a novel RNase, designated as RNase G, involved in processing of the 5' end of 16S rRNA. *Biochem. Biophys. Res. Commun.*, **259**, 482-488.
65. Otsuka, Y. & Yonesaki, T. (2005) A novel endoribonuclease, RNase LS, in *Escherichia coli*. *Genetics*, **169**, 13-20.
66. Kole, R., Baer, M., Stark, B., and Altman, S. (1980) E. coli RNase P has a required RNA component *in vivo*. *Cell*, **19**, 881-887.

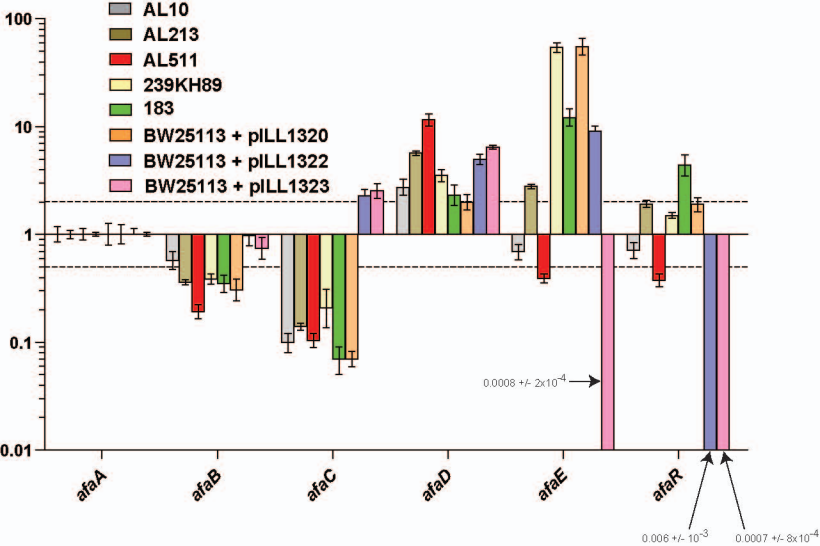

A

[*afaB*] →

TTACGGATTACGGCGGAAAGAGTAAGCCGTTTGAATCGGAATTA AAAAGCTGAAAGCCGGAATAAATATTAACGTCAG

x2

x4

AGGCGGGCTTATTTGATTAACCCGGTTGAATATCTGAGCGTGTTTGAATAAGTGTGTGTGAACAGGCGTGCAAACGC

\*x2

ACAAATACGTGTGTATATCCTCCGGCATATGTAAATAAAAAGAAACCGTGGCTCAGGTGTGAATAATG

[*afaC*] →

Met

B

[*afaC*] →

AGCAACTGGTATTTTTCTGGTGCGCACTGTGTGTATGTGACCAAGGAGTACCCTGATGAAGAAAATACAGATAGTATG

AfaR binding site

x3

[*afaD*] →

Met

TAGTGGTATTGTA CTGGTGGTTATATCCAGTCTGGCGCAGGCAGTTGAACTGAGTCTTAATACCAGTGATGGAAGGAG

x3

x2

\*

x3

TGGCGAGTTAAAAGACGGTACGAAGGTGGCAACAGGAAGGATTATCTGCCGAGGCACCTATACAAGTTTTTCATATCTG

x2

A

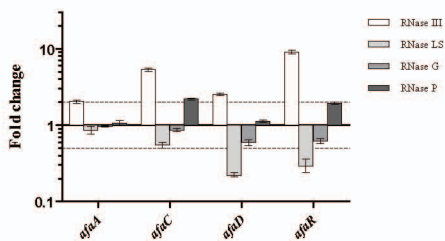

B

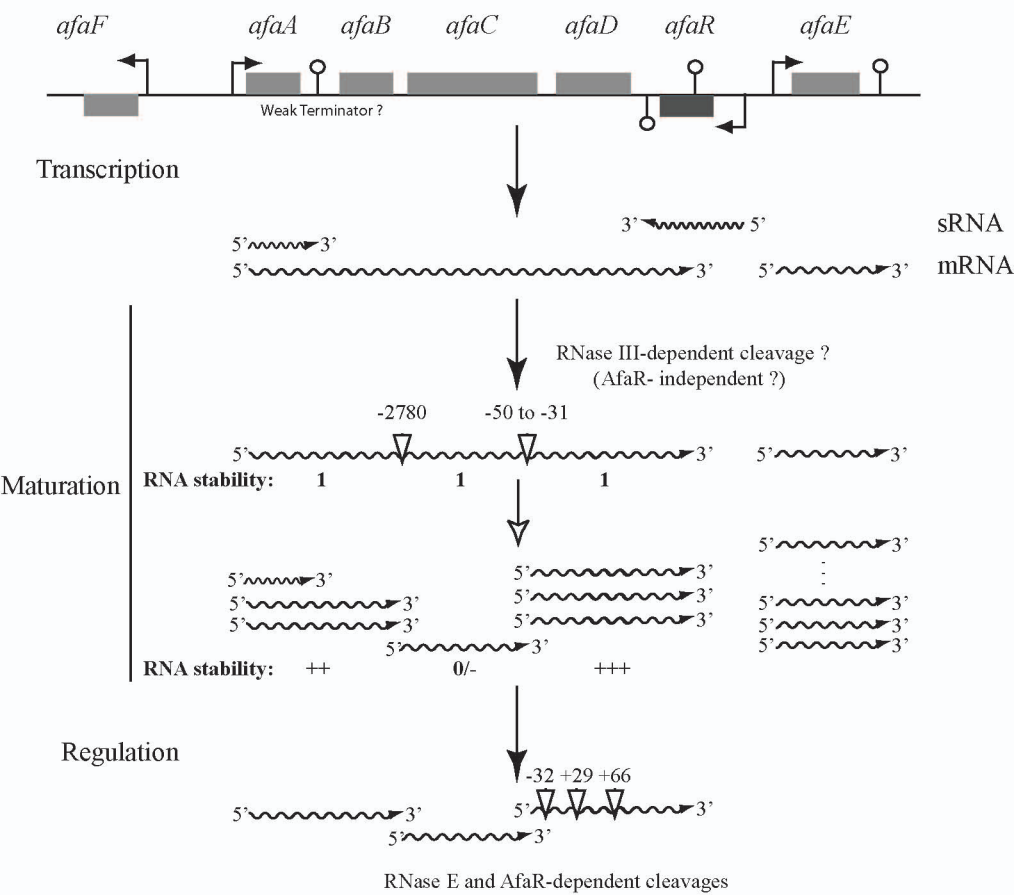

Supplement: supp_gkt208_nar-03139-c-2012-File010.pdf [file supp_gkt208_nar-03139-c-2012-File010.pdf]
